# Supplementary material for: Influences of topography on nitrate export from forested watersheds on Yakushima Island, a Natural World Heritage site
Source: Royal Society of Chemistry journal article supplement (doi:10.1039/d4ra04168b), 2024-01-01
Supplement: d4ra04168b2.pdf [file d4ra04168b2.pdf]

### Supplemental Figure Captions

#### Supplemental Figure S1

Concentrations of major ionic components in the western region (blue), other regions (red), and groundwater (green) during the long-term monitoring study (two-weekly samples)

#### Supplemental Figure S2

NO<sub>3</sub> concentrations in river water in the western region and other regions from 1996 to 2014

#### Supplemental Figure S3

Concentrations of major ionic components in the western region (blue), other regions (red), and groundwater (green) in December 2018

#### Supplemental Figure S4

Wet deposition (NO<sub>3</sub><sup>-</sup> and NH<sub>4</sub><sup>+</sup>) from January 2011 to December 2018. The grey bars indicate NO<sub>3</sub><sup>-</sup> and white bars indicate NH<sub>4</sub><sup>+</sup>. Data for December 2017 and January and February 2018 were not observed. This graph was used data from Ministry of the Environment Government of Japan Acid rain monitoring result.<sup>1</sup>
