# Supplementary figures and images for: Influences of topography on nitrate export from forested watersheds on Yakushima Island, a Natural World Heritage site
Source: Royal Society of Chemistry journal article supplement (doi:10.1039/d4ra04168b), 2024-01-01

## Supplemental Figure S1

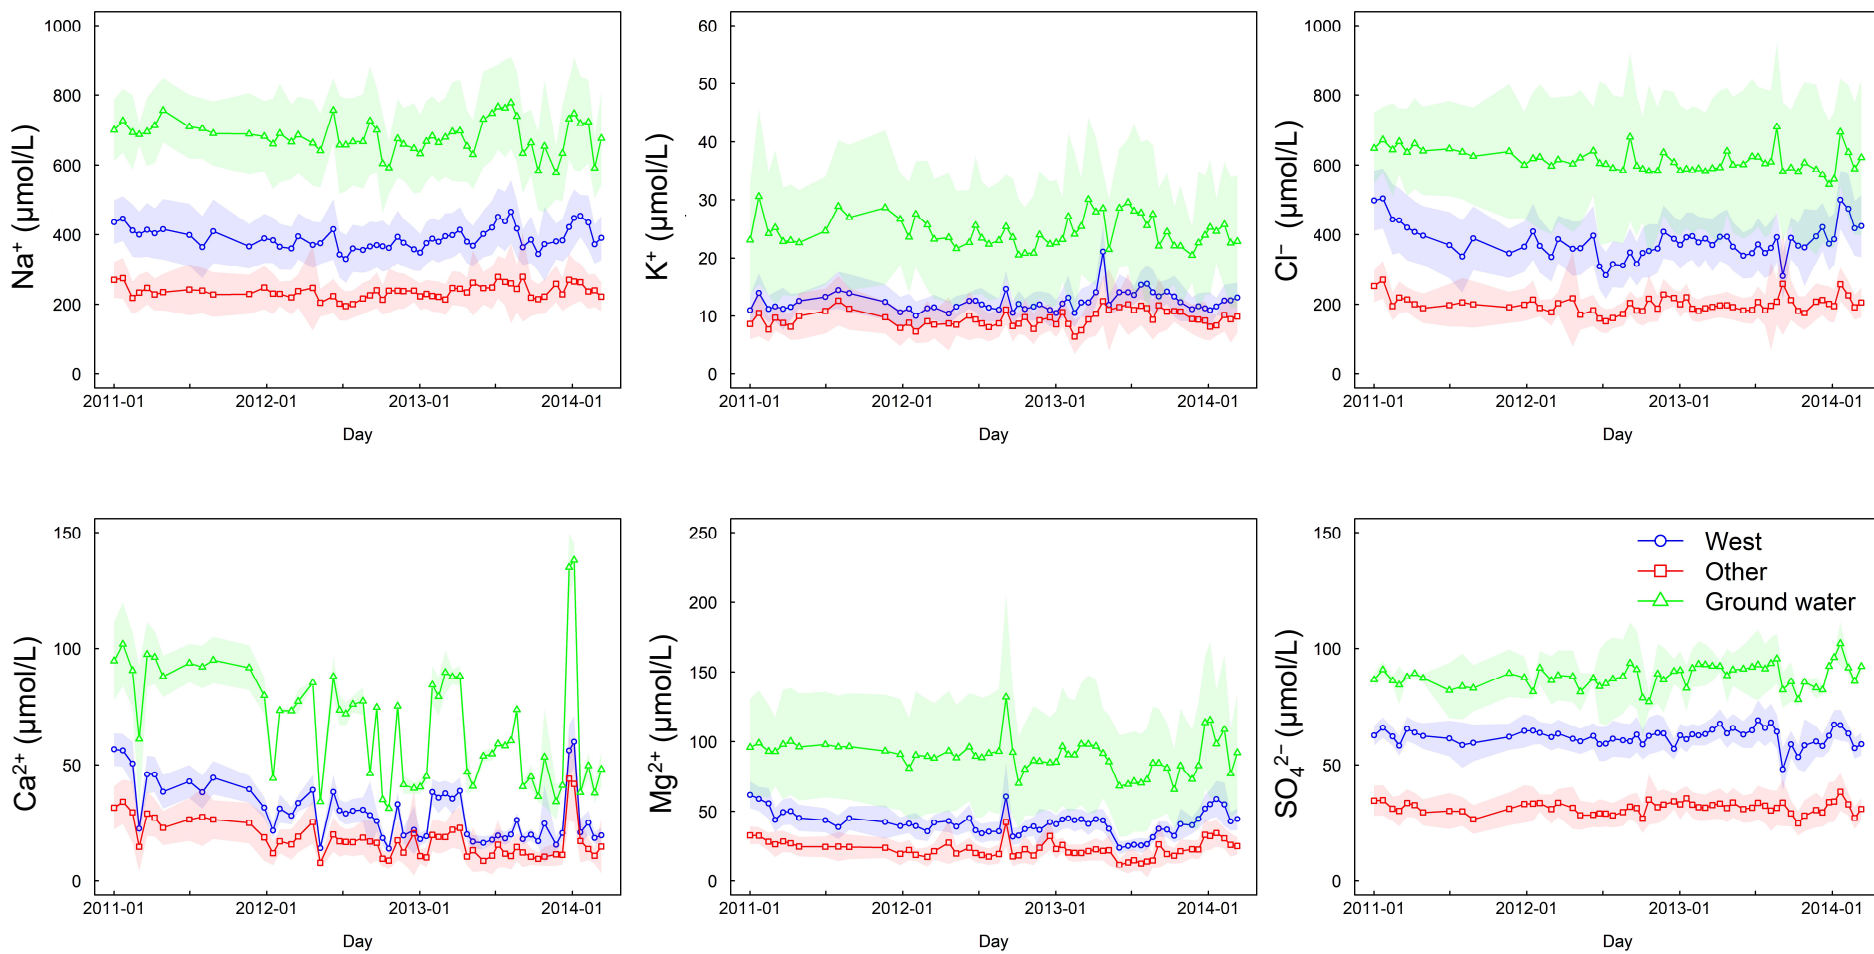

Supplemental Figure S2

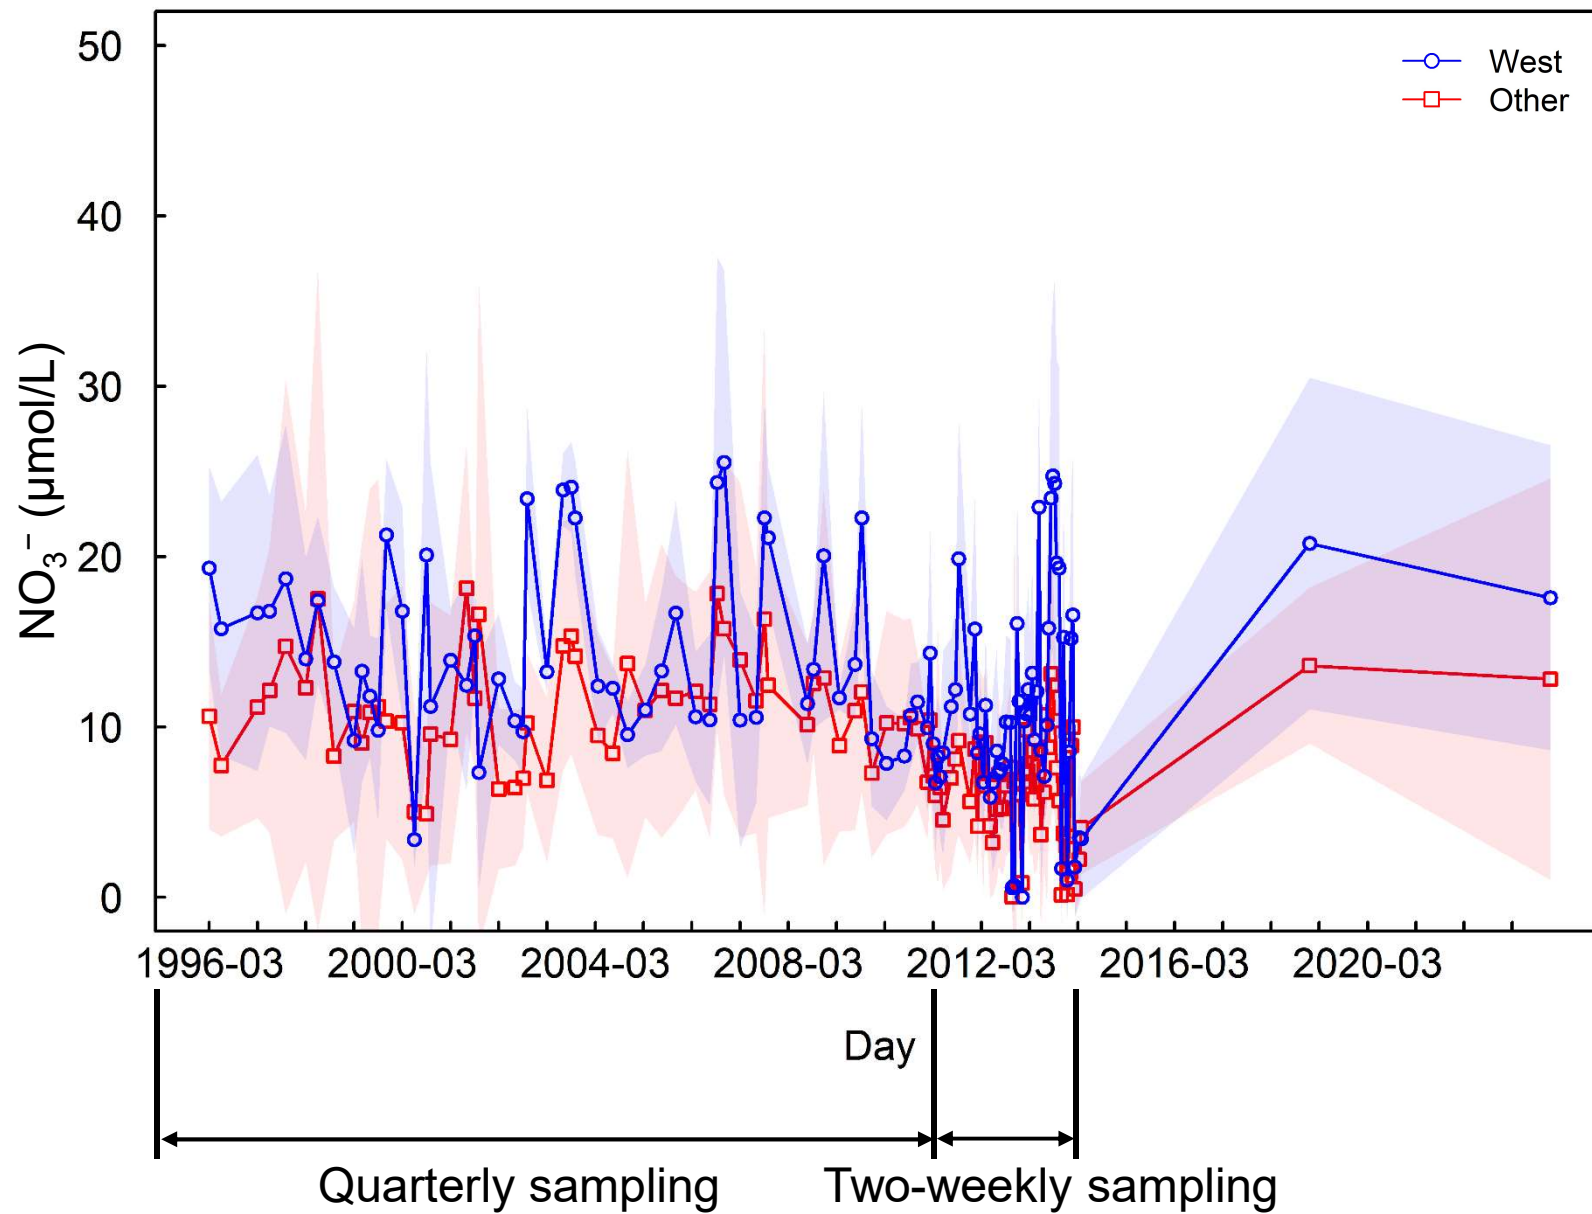

# Supplemental Figure S3

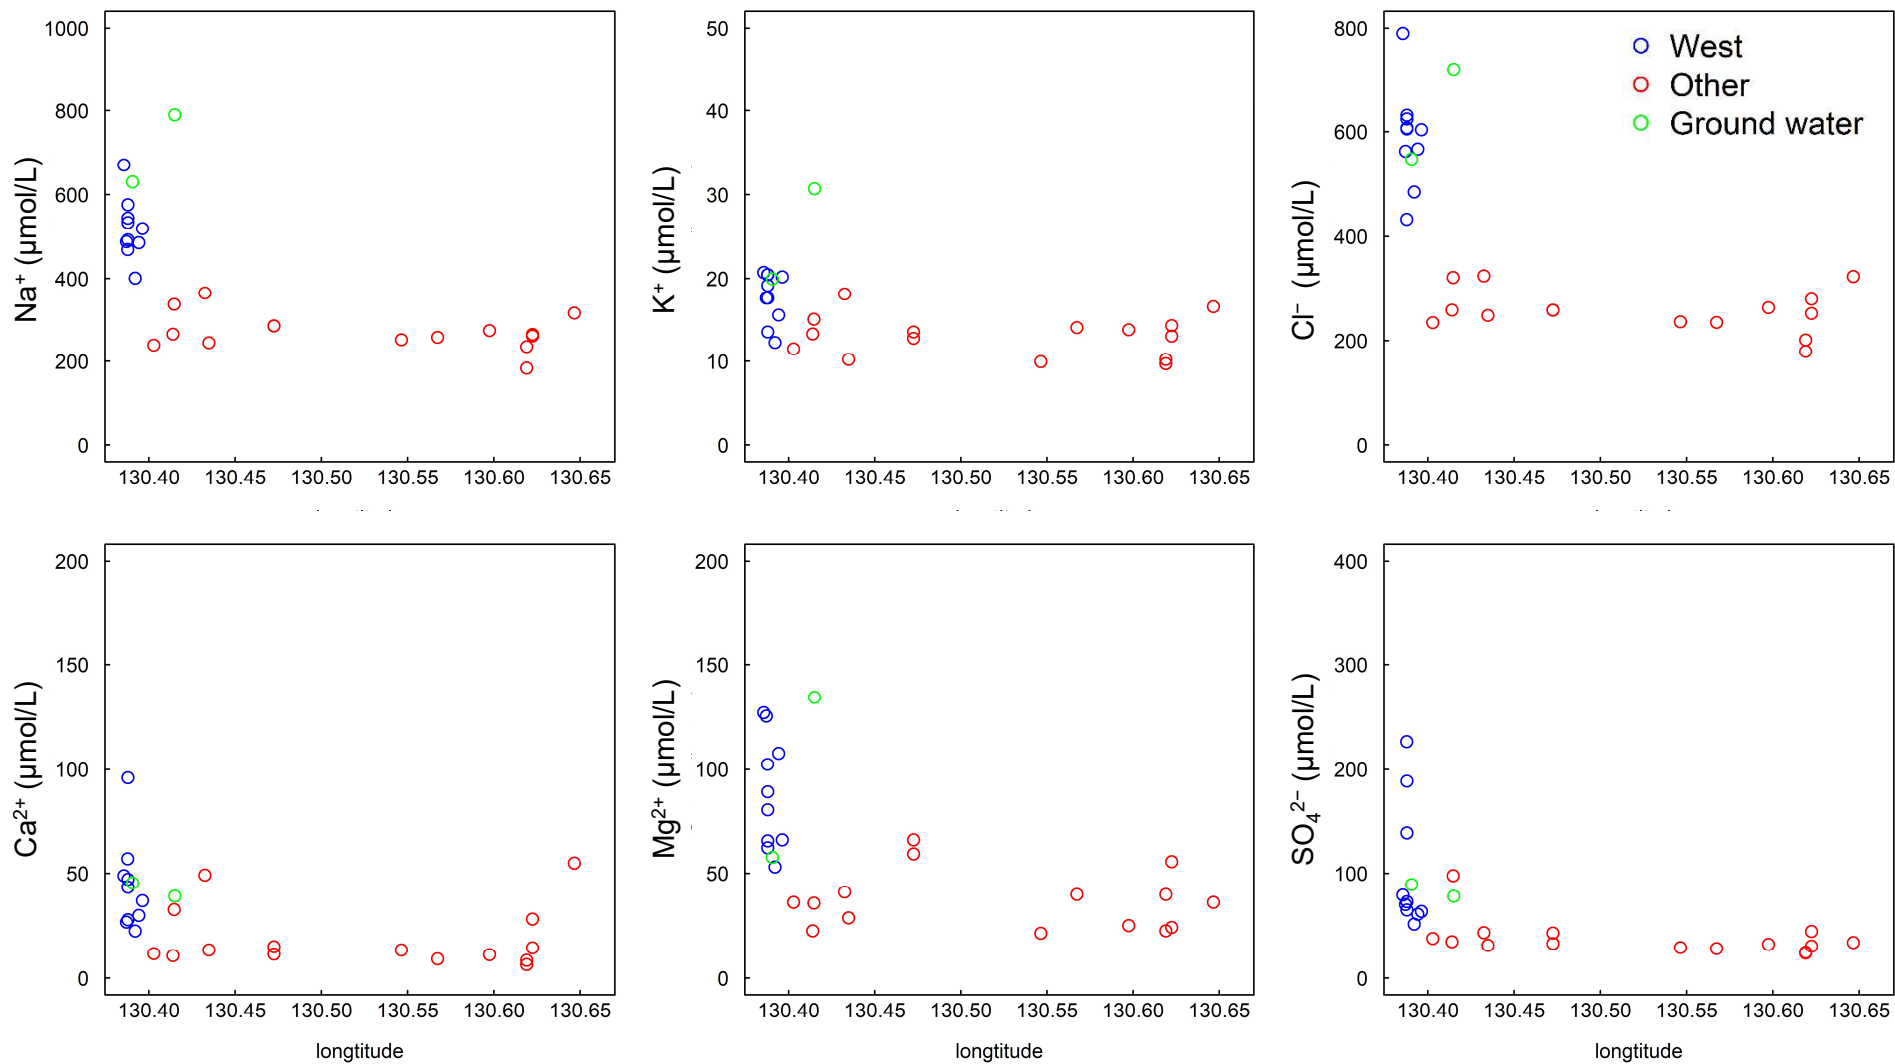

Supplemental Figure S4

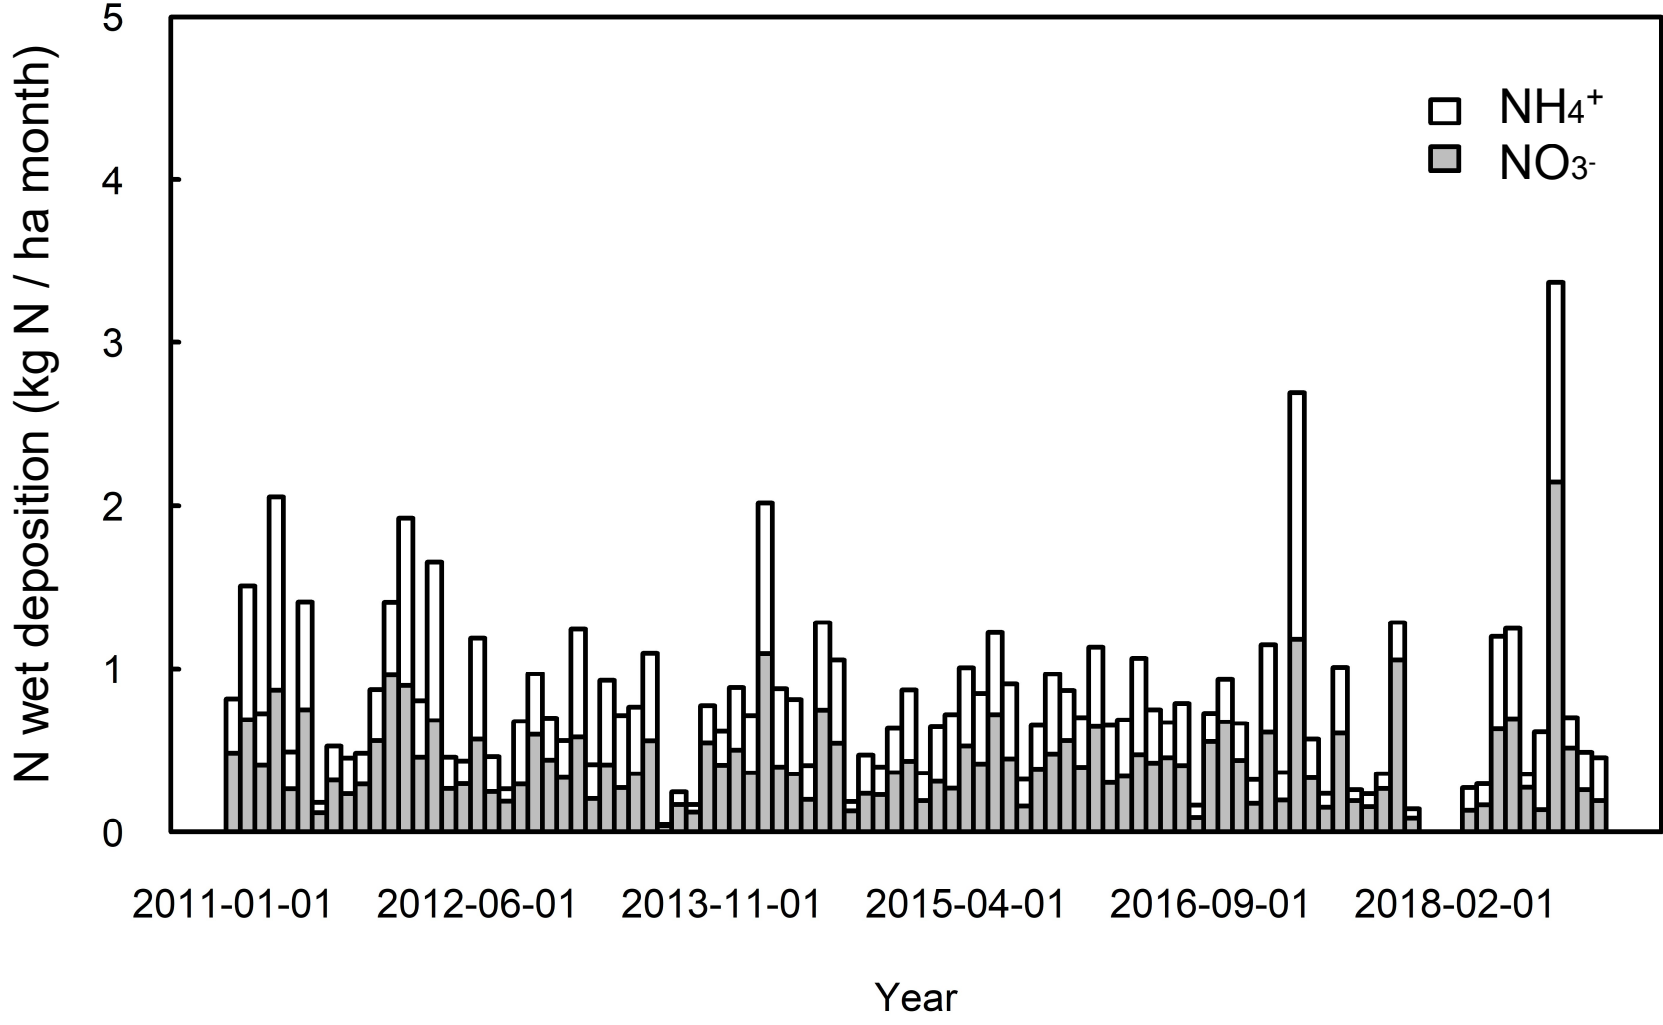

Supplement: d4ra04168b1.pdf [file d4ra04168b1.pdf]
